# Supplementary material for: Fishing of α-Glucosidase’s Ligands from Aloe vera by α-Glucosidase Functionalized Magnetic Nanoparticles
Source: MDPI journal article supplement (doi:10.3390/molecules26195840), 2021-09-26
Supplement: s1 [file s1]

# Supplementary Material: Fishing of $\alpha$ -glucosidase's ligands from *Aloe vera* by $\alpha$ -glucosidase functionalized magnetic nanoparticles

Hao Yuan, Hong Wan, Yi-kao Hu, Qiang Chang, Emmanuel Ayodeji Ayeni, Xun Liao

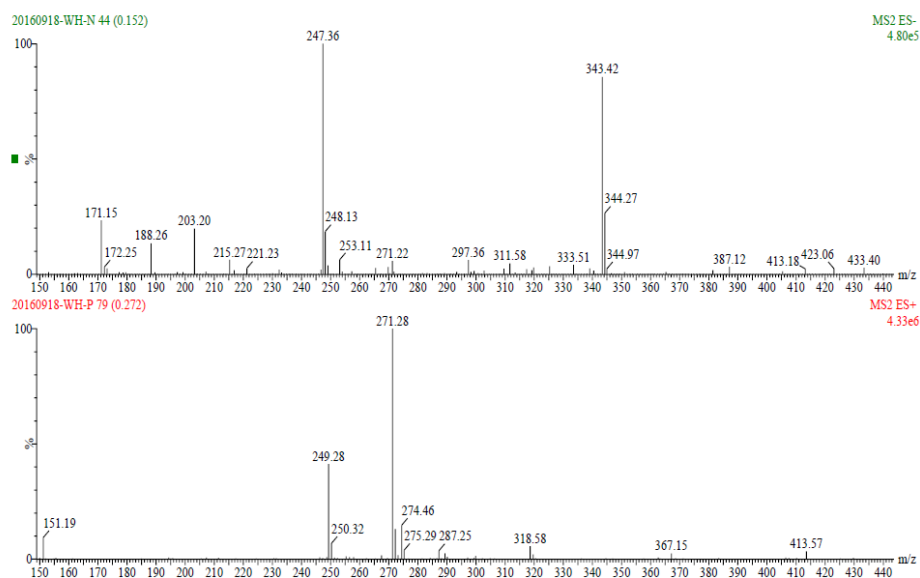

Figure S1. MS spectra of **1**.

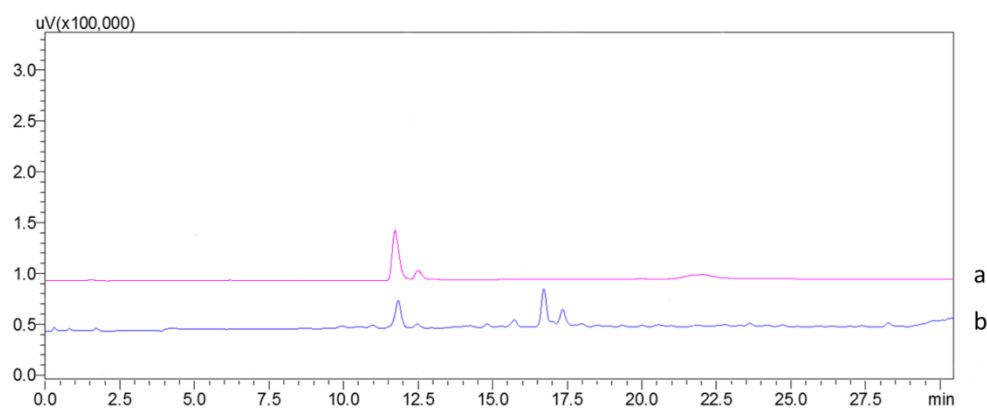

Figure S2. HPLC-UV analysis of (a) aloenin aglycone isolated from *Aloe vera*; (b) solution of ligands,  $S_5$ .

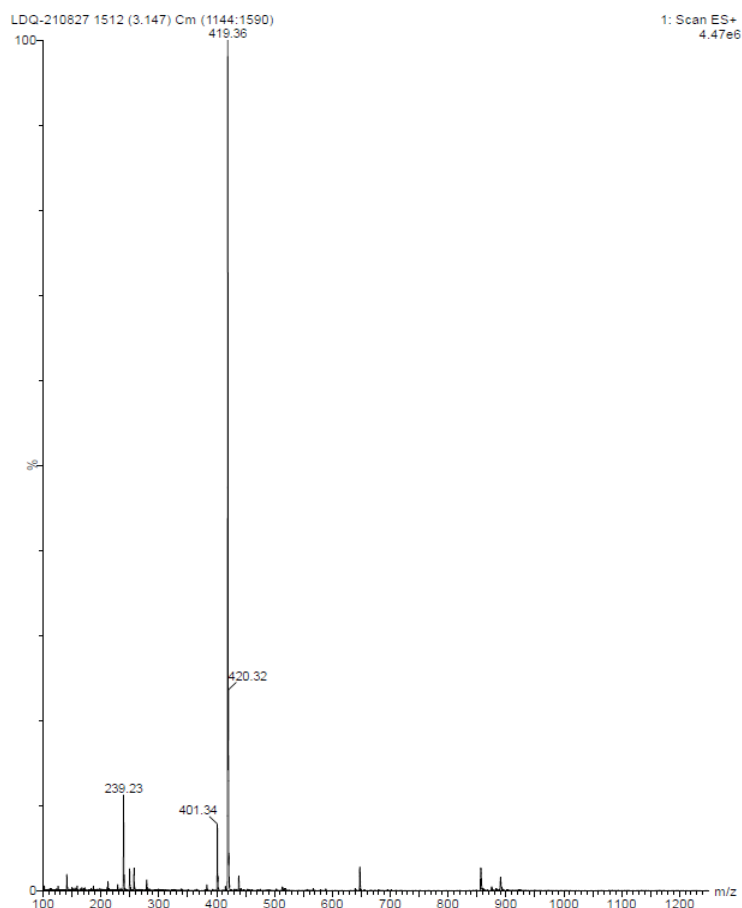

Figure S3. MS spectrum of **3**.

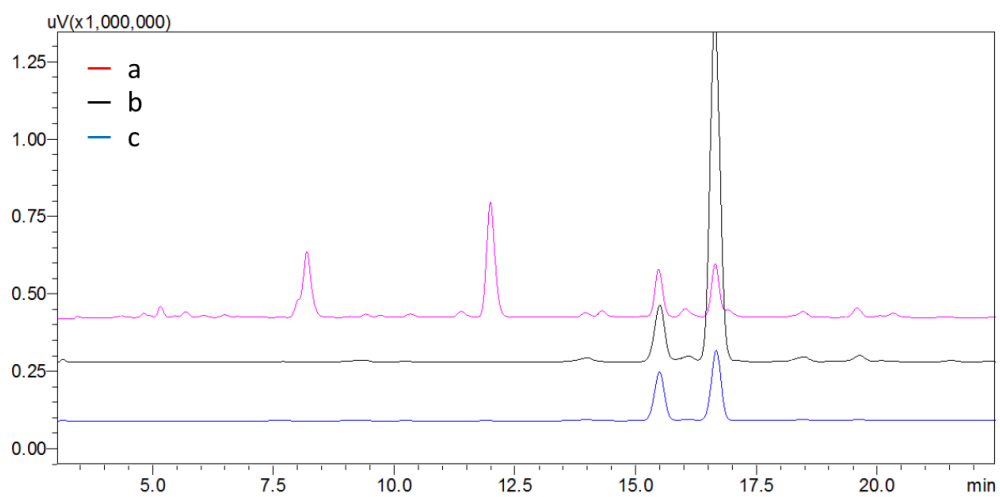

Figure S4. HPLC-UV analysis of (a) *Aloe vera* extract solution,  $S_0$ ; (b) aloin A isolated from *Aloe vera*; (c) reference substance of aloin.

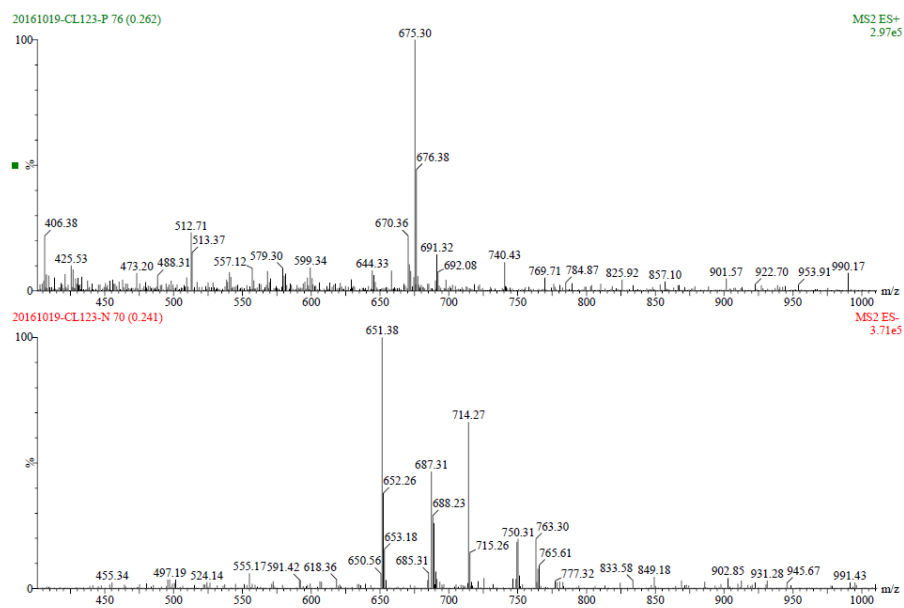

Figure S5. MS spectra of **2**.

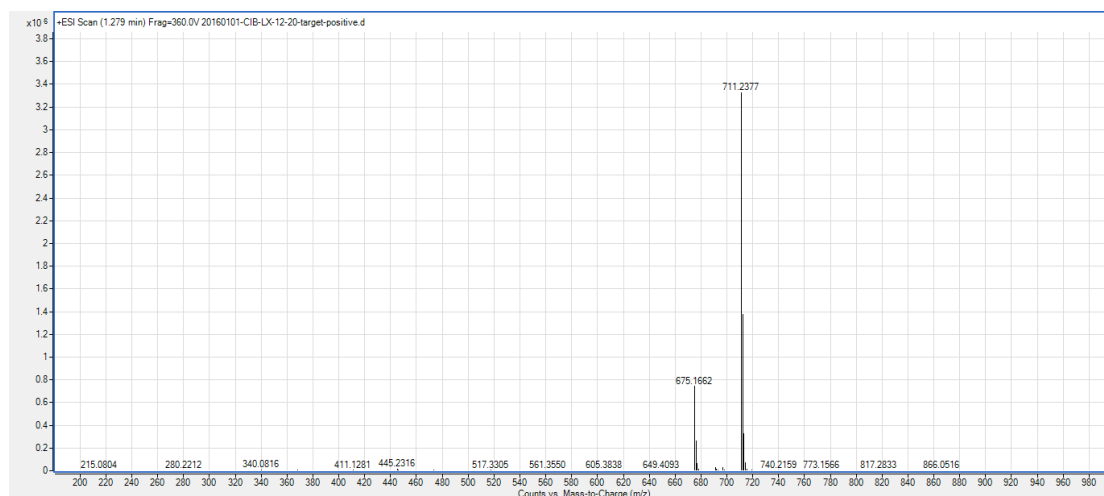

Figure S6. HRESIMS spectrum of **2** (positive ion mode).

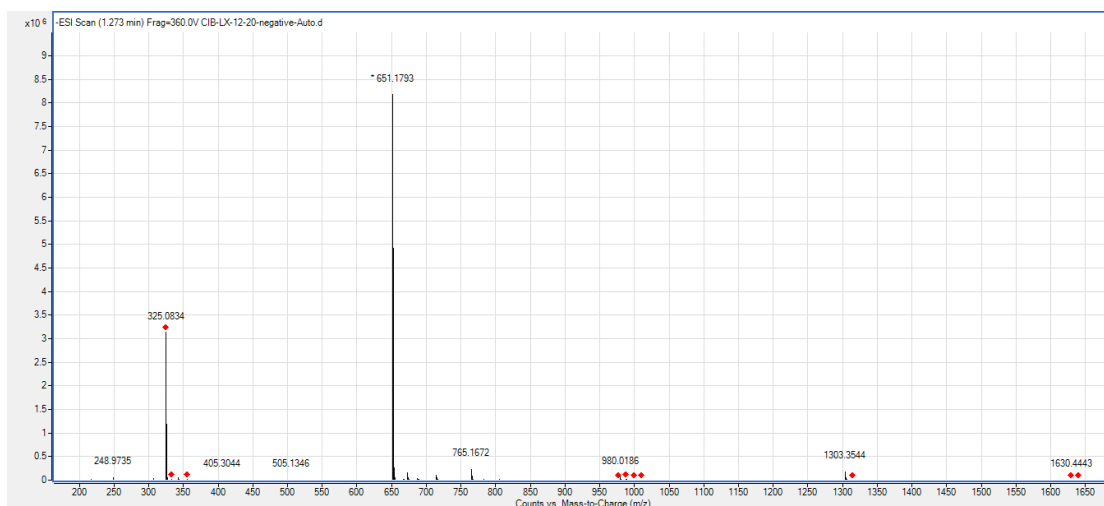

Figure S7. HRESIMS spectrum of **2** (negative ion mode).

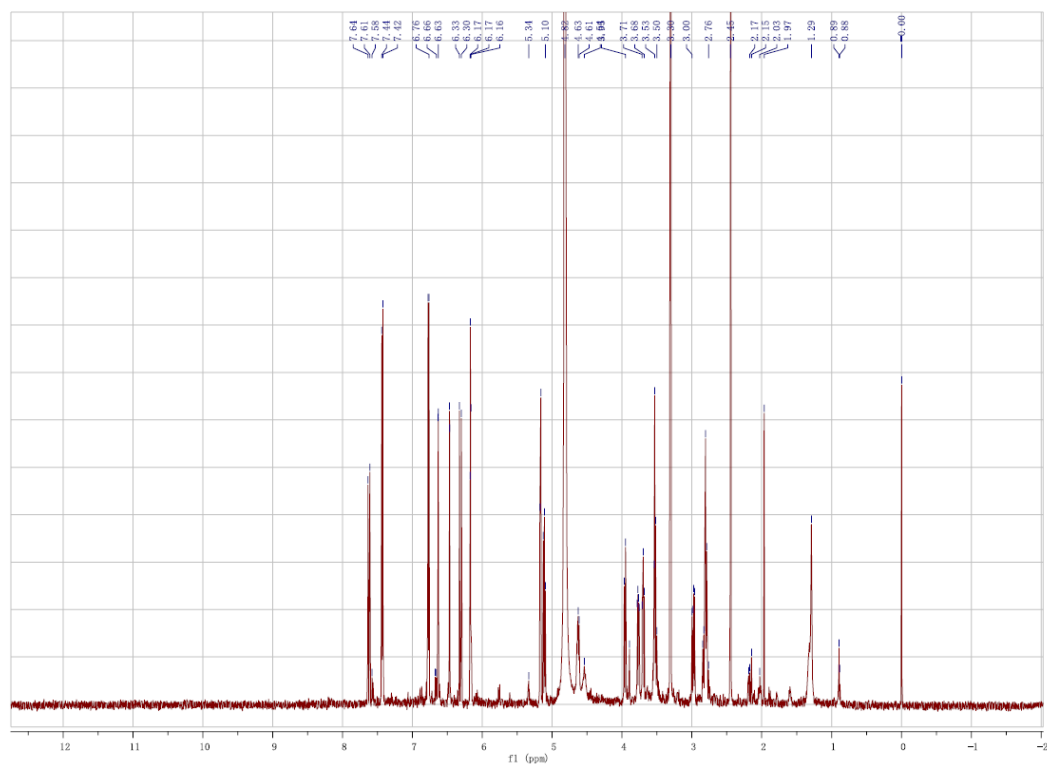

Figure S8.  $^1\text{H}$  NMR (600 Hz) spectrum of **2** in methanol- $d_4$ .



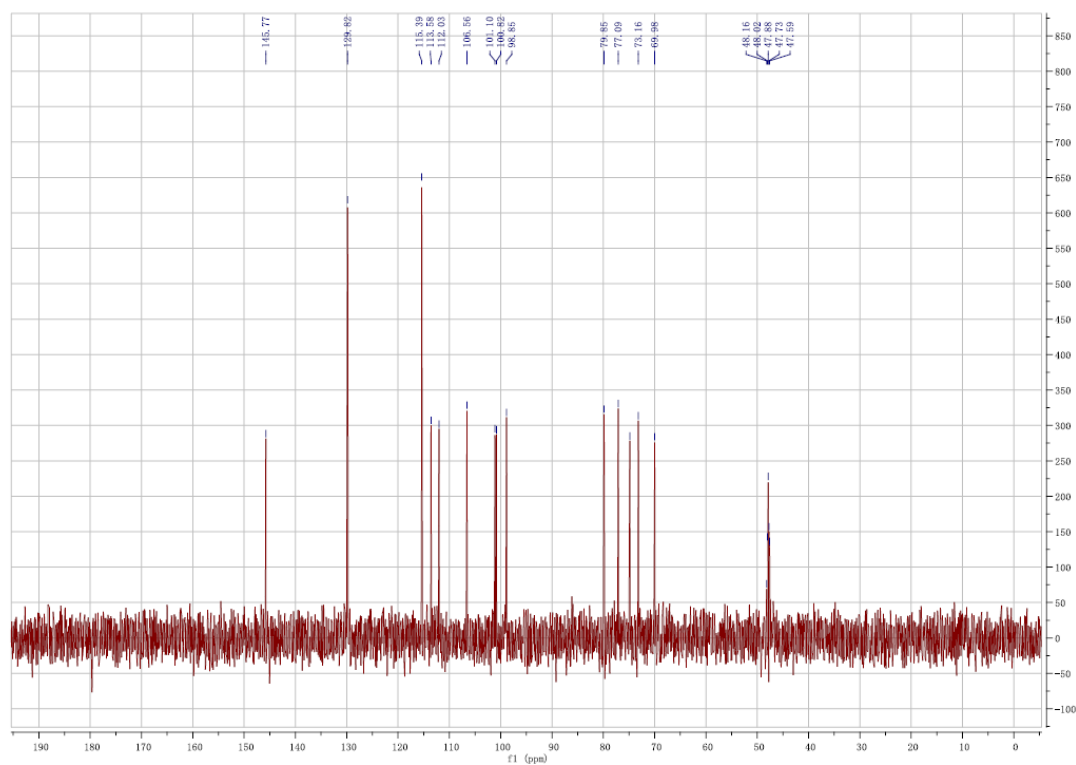

Figure S11. DEPT 90 ° spectrum of **2** in methanol- $d_4$ .

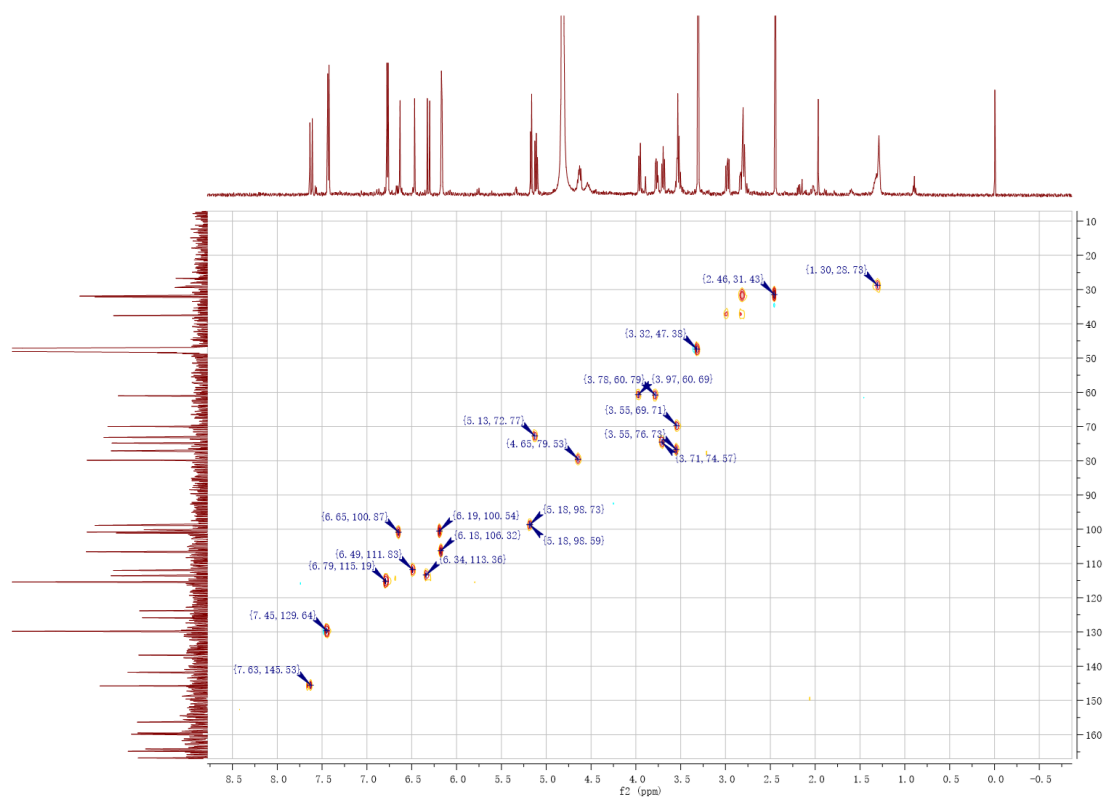

Figure S12. HSQC spectrum of **2** in methanol- $d_4$ .

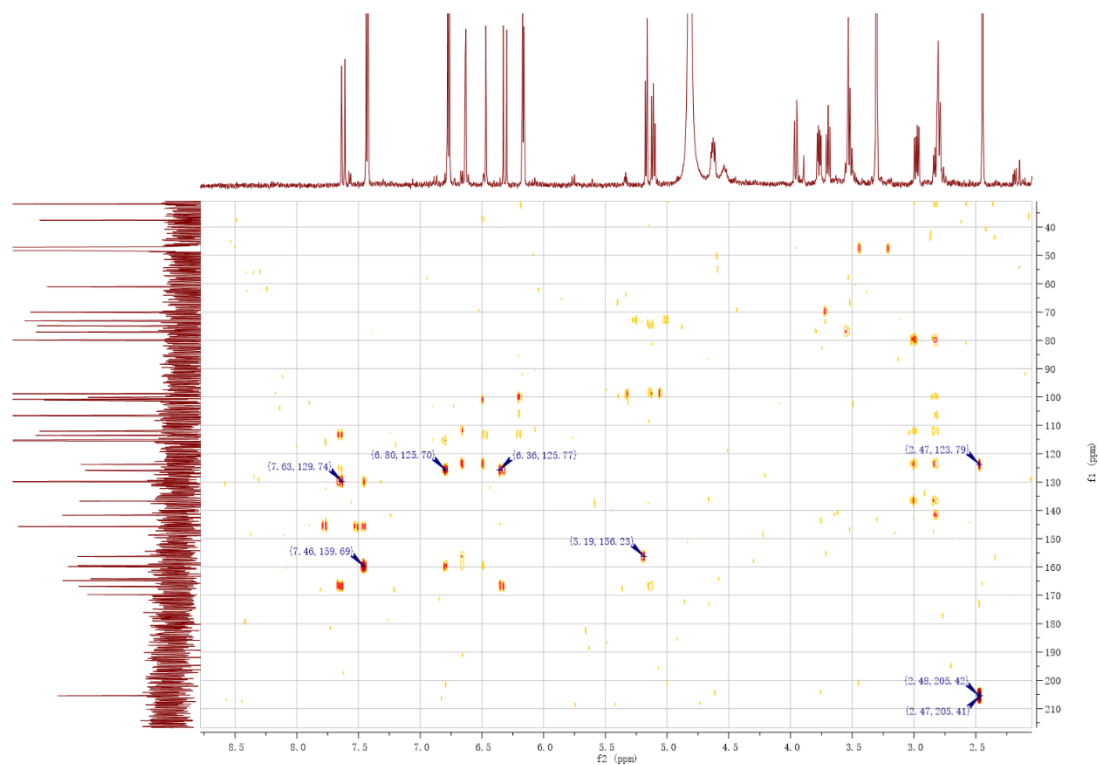

Figure S13. HMBC spectrum of **2** in methanol- $d_4$ .
